# Supplementary material
Source: MDPI journal article supplement (https://www.mdpi.com/2079-6439/9/9/54)
Supplement: s1 [file s1]

## SupplementaryMaterials

**Table S1.** Semi-quantitative estimate of crystallinity for flax fibers.

| Flax ID | TCI   | LOI   | HBI   | I     |
|---------|-------|-------|-------|-------|
| NW      | 0.963 | 1.108 | 0.930 | 0.976 |
| A-E     | 0.981 | -     | 0.942 | 0.993 |
| A-H     | 0.949 | 1.101 | 0.962 | 0.986 |
| A-EW    | 0.957 | 1.120 | 0.937 | 0.982 |
| B-EHA   | 0.960 | -     | 0.965 | 0.992 |
| B-HEA   | 0.948 | -     | 0.979 | 0.993 |
| B-EAH   | 0.948 | 1.109 | 0.937 | 0.979 |

**Table S2.** Semi-quantitative estimate of crystallinity of sisal fibers.

| Sisal ID | TCI   | LOI   | HBI | I |
|----------|-------|-------|-----|---|
| NW       | 1.117 | 1.058 | -   | - |
| A-E      | 1.038 | -     | -   | - |
| A-H      | 0.969 | 1.054 | -   | - |
| A-EW     | 1.120 | -     | -   | - |
| B-EHA    | 0.926 | -     | -   | - |
| B-HEA    | 0.894 | -     | -   | - |
| B-EAH    | 0.917 | -     | -   | - |

**Table S3.** Semi-quantitative estimate of crystallinity of hemp fibers.

| Hemp ID | TCI   | LOI   | HBI   | I     |
|---------|-------|-------|-------|-------|
| NW      | 1.007 | 1.090 | 0.982 | 0.987 |
| A-E     | 0.911 | -     | 1.003 | 0.984 |
| A-H     | 1.000 | 1.053 | 0.995 | 0.991 |
| A-EW    | 1.016 | 1.108 | 0.989 | 0.984 |
| B-EHA   | 0.968 | -     | 0.974 | 0.995 |
| B-HEA   | 0.954 | -     | 0.938 | 0.988 |
| B-EAH   | 0.962 | 1.092 | 0.991 | 0.986 |

**Table S4.** Tensile properties of flax yarns (CoV% is given inside parenthesis).

| Fiber ID | P <sub>max</sub> (N) | f <sub>t</sub> (MPa) | E (Mpa)    | ε <sub>t</sub> (%) |
|----------|----------------------|----------------------|------------|--------------------|
| NW       | 230 (9%)             | 234 (9%)             | 9014 (7%)  | 2.85 (8%)          |
| A-E      | 187 (8%)             | 207 (8%)             | 9128 (8%)  | 2.55 (8%)          |
| A-H      | 208 (19%)            | 244 (19%)            | 9820 (14%) | 2.80 (15%)         |
| A-EW     | 200 (15%)            | 220 (15%)            | 8564 (7%)  | 2.79 (10%)         |
| B-EHA    | 323 (5%)             | 305 (5%)             | 10216 (4%) | 3.25 (6%)          |
| B-HEA    | 341 (6%)             | 336 (6%)             | 10164 (5%) | 3.45 (7%)          |
| B-EAH    | 348 (6%)             | 366 (6%)             | 10478 (7%) | 3.57 (7%)          |

**Table S5.** Tensile properties of sisal yarns (CoV% is given inside parenthesis).

| Fiber ID | P <sub>max</sub> (N) | f <sub>t</sub> (Mpa) | E (Mpa)    | ε <sub>t</sub> (%) |
|----------|----------------------|----------------------|------------|--------------------|
| NW       | 909 (14%)            | 238 (14%)            | 6373 (7%)  | 3.77 (7%)          |
| A-E      | 679 (10%)            | 246 (11%)            | 6931 (7%)  | 3.71 (8%)          |
| A-H      | 697 (10%)            | 221 (11%)            | 6009 (10%) | 3.79 (4%)          |
| A-EW     | 738 (12%)            | 220 (12%)            | 5621 (6%)  | 4.02 (8%)          |
| B-EHA    | 883 (17%)            | 302 (18%)            | 8127 (11%) | 3.86 (6%)          |
| B-HEA    | 727 (12%)            | 246 (13%)            | 6384 (6%)  | 3.97 (13%)         |
| B-EAH    | 1027 (12%)           | 291 (12%)            | 7036 (5%)  | 4.02 (7%)          |

**Table S6.** Tensile properties of hemp yarns (CoV% is given inside parenthesis).

| Fiber ID | $P_{\max}$ (N) | $f_t$ (MPa) | E (MPa)     | $\epsilon_t$ (%) |
|----------|----------------|-------------|-------------|------------------|
| NW       | 161 (14%)      | 221 (14%)   | 9060 (10%)  | 2.68 (10%)       |
| A-E      | 103 (6%)       | 181 (6%)    | 9776 (13%)  | 2.28 (16%)       |
| A-H      | 155 (17%)      | 211 (17%)   | 8475 (18%)  | 2.65 (9%)        |
| A-EW     | 140 (17%)      | 261 (17%)   | 10507 (11%) | 2.68 (6%)        |
| B-EHA    | 191 (13%)      | 312 (13%)   | 12715 (8%)  | 2.81 (10%)       |
| B-HEA    | 104 (11%)      | 171 (11%)   | 9217 (12%)  | 2.35 (15%)       |
| B-EAH    | 192 (23%)      | 337 (23%)   | 12430 (15%) | 2.77 (9%)        |
